# Supplementary material for: Impaired male fertility and abnormal epididymal epithelium differentiation in mice lacking CRISP1 and CRISP4
Source: PubMed Central journal article supplement (PMC6277452; doi:10.1038/s41598-018-35719-3), 2018-12-03

1 **Impaired male fertility and abnormal epididymal epithelium**  
2 **differentiation in mice lacking CRISP1 and CRISP4**

3 Carvajal Guillermo, Brukman, Nicolás G, Weigel Muñoz Mariana, Battistone María A,  
4 Guazzone Vanesa A, Ikawa Masahito, Haruhiko Miyata, Lustig Livia, Breton Sylvie,  
5 Cuasnicu Patricia S

6

7 **Supplementary file**

8

9

10

11

12

13

14

15

**a**

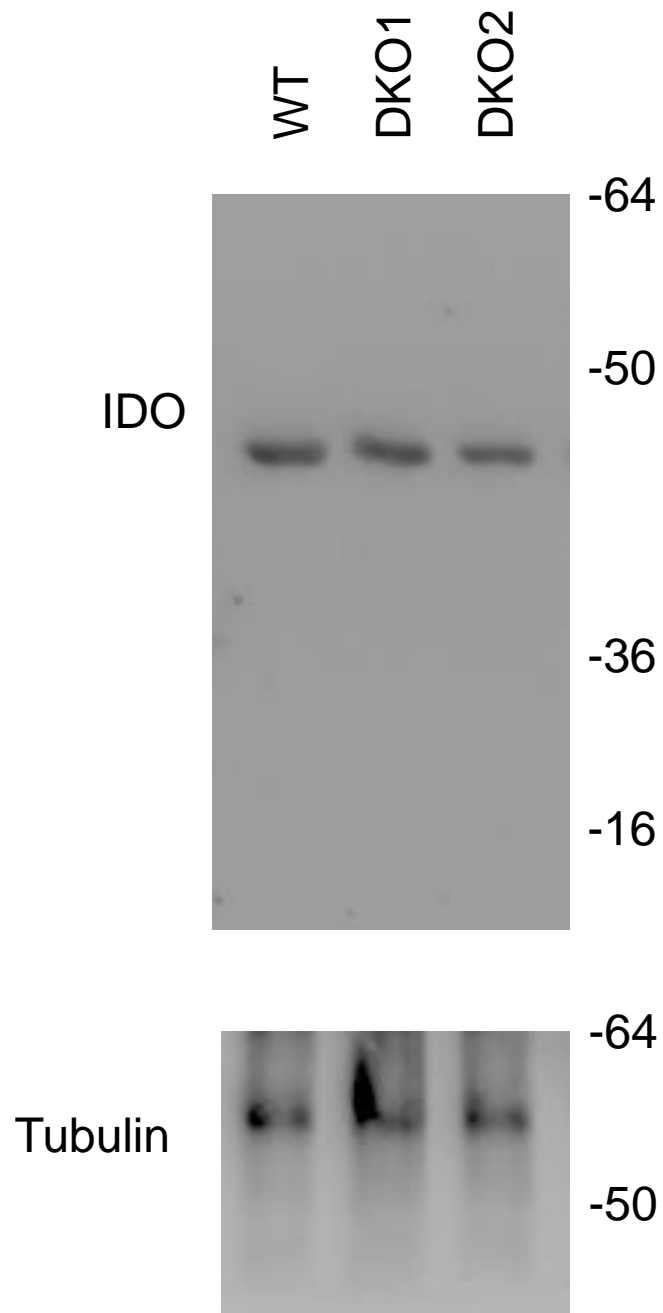

**b**

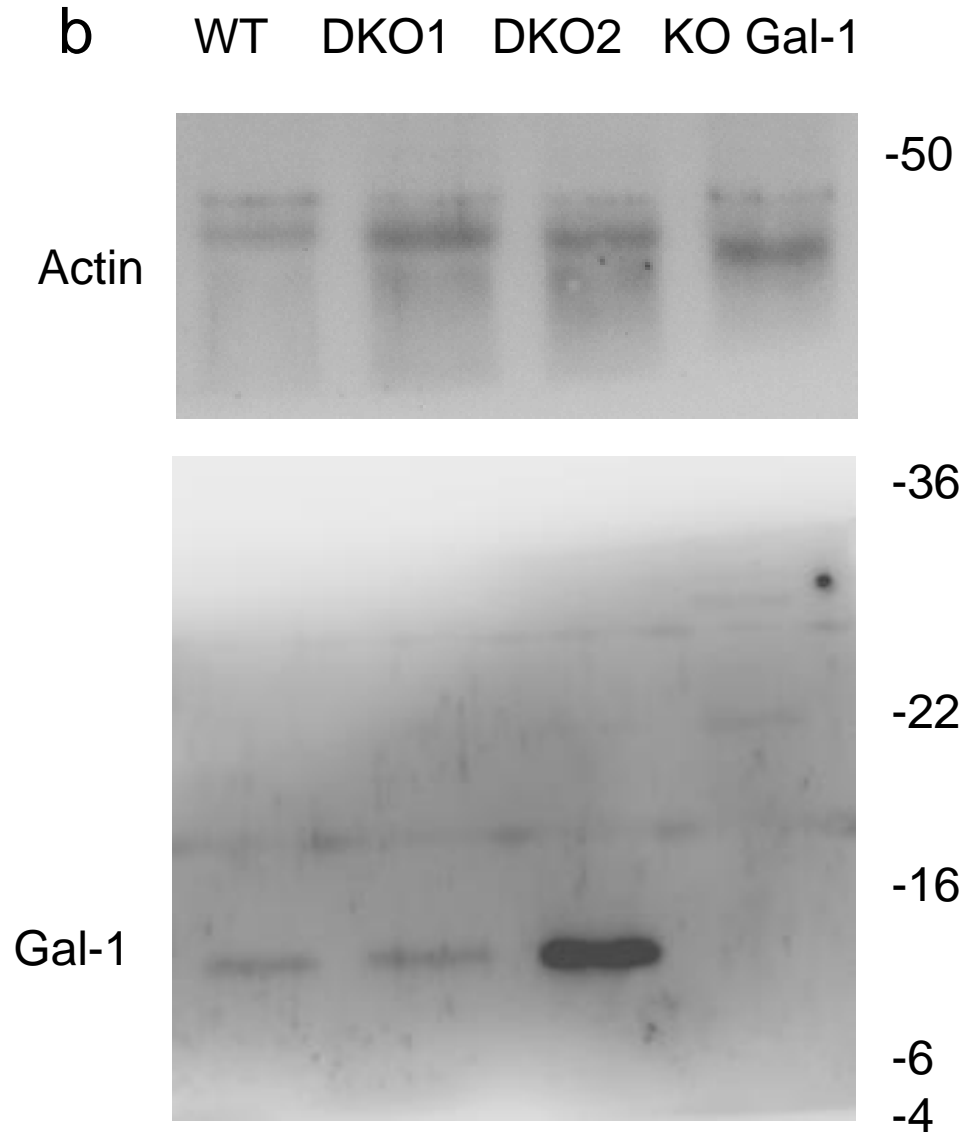

Supplement: 41598_2018_35719_MOESM2_ESM.pdf [file 41598_2018_35719_MOESM2_ESM.pdf]
